## PUBLISHER'S NOTE

# Expression of Concern: Protein kinase D activity controls endothelial nitric oxide synthesis. Clara Aicart-Ramos, Lucía Sánchez-Ruiloba, Mónica Gómez-Parrizas, Carlos Zaragoza, Teresa Iglesias, Ignacio Rodríguez-Crespo. *J. Cell Sci.* doi: 10.1242/jcs.148601

**Michael Way**

Editor-in-Chief, Journal of Cell Science (jcs@biologists.com)

This Expression of Concern relates to the article 'Protein kinase D activity controls endothelial nitric oxide synthesis' by Clara Aicart-Ramos, Lucía Sánchez-Ruiloba, Mónica Gómez-Parrizas, Carlos Zaragoza, Teresa Iglesias and Ignacio Rodríguez-Crespo. *J. Cell Sci.* (2014). **127**, 3360-3372 (doi: 10.1242/jcs.148601).

We have recently been made aware of concerns regarding some of the data in Fig. 4J. After discussion with the corresponding author, Ignacio Rodríguez-Crespo, we have referred this matter to Dr Rodríguez-Crespo's institute. Journal of Cell Science is publishing this note to make readers aware of the issue, and we will provide further information once it has been resolved.

This course of action follows the advice set out by COPE (Committee on Publication Ethics), of which Journal of Cell Science is a member.

See also:

doi: 10.1242/jcs.209973

doi: 10.1242/jcs.209981

doi: 10.1242/jcs.209999
